# Supplementary material for: Enhancement of surface nonwettability by grafting loops
Source: Royal Society of Chemistry journal article supplement (doi:10.1039/c6cp07596g), 2017-01-01
Supplement: c6cp07596g1.pdf [file c6cp07596g1.pdf]

## Supporting Information

### Enhancement of surface nonwettability by grafting loops

Han-Wen Pei, Hong Liu\*, You-Liang Zhu, Zhong-Yuan Lu

#### Influence of interaction strength between loops/hairs:

We vary the interaction strength between loops/hairs ( $\varepsilon_{LL}$ ) to investigate its influence on nonwettability. Loops/hairs with large  $\varepsilon_{LL}$  tend to cluster with their neighbors. To do so, take the surface with regularly grafted loops of different rigidities ( $k_{\text{bend}}=100k_B T/\sigma^2$  and  $k_{\text{bend}}=400k_B T/\sigma^2$ ) as examples. For the surface grafted with flexible loops ( $k_{\text{bend}}=100k_B T/\sigma^2$ ), the contact angle increases when  $\varepsilon_{LL}$  increases to a certain value ( $\geq 1.5k_B T$ ) in Fig. S1(a). The large  $\varepsilon_{LL}$  is beneficial to the loop clustering, which increases the steric barrier of the wetting of the droplet and hence increases the contact angle. For the surface grafted with rigid loops ( $k_{\text{bend}}=400k_B T/\sigma^2$ ), the contact angle has the similar tendency with flexible loops in Fig. S2(b). In this case, loops also tend to cluster together when  $\varepsilon_{LL}$  increases, leaving a large distance between loop clusters. The large distance helps to decrease the number of loop particles which contacts the droplet. As a result, the contact angle slightly increases.

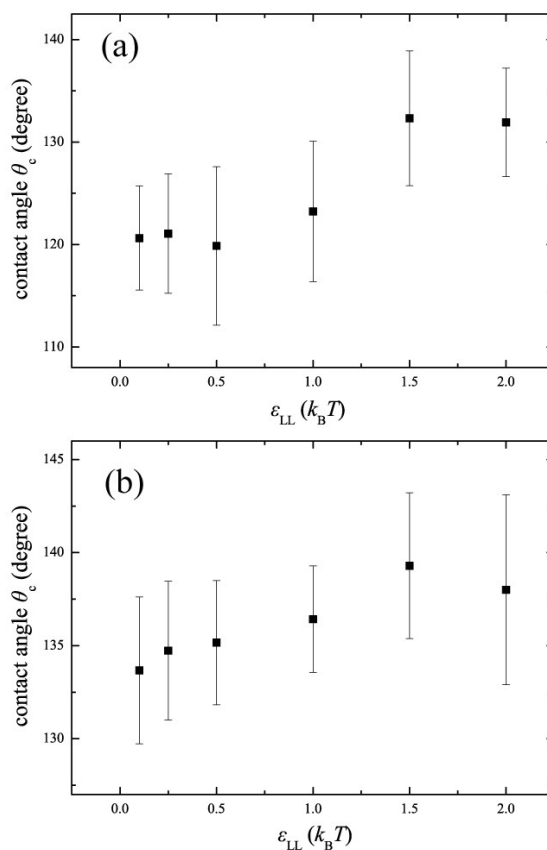

Fig. S1 The dependence of contact angle on the interaction strength between loops ( $\epsilon_{LL}$ ) for the surface with regularly grafted loops. Two different rigidities of loops are considered: (a)  $k_{\text{bend}}=100k_B T/\sigma^2$ ; (b)  $k_{\text{bend}}=400k_B T/\sigma^2$ . The interaction strength between loops is tuned by changing  $\epsilon_{LL}$ . Five samples are chosen to calculate the mean value and the error bar for each point.
